# Supplementary material for: Circulating Immune Proteins: Improving the Diagnosis and Clinical Outcome in Advanced Non-Small Cell Lung Cancer
Source: Int J Mol Sci. 2023 Dec 18;24(24):17587. doi: 10.3390/ijms242417587 (PMC10743468; doi:10.3390/ijms242417587)
Supplement: Supplementary file 1 [file ijms-24-17587-s001.zip › ijms-2656693-Supplementary Table S1.xlsx]

## Sheet: Table S1
Table S2. Detailed clinicopathological characteristics of the patients included in the study.
Patient ID	Age	Sex	Smoking status	Histology subtype	Stage prior to immunotherapy	PD-L1 TPSa	First-line treatment	RECIST response at ~6 months	Durable clinical benefit (DCB)	Progression-free survival (months)	Overall survival (months)
P1	52	Female	Smoker	Poorly differenciate	IVB	90	Pembrolizumab	Partial Response	DCB	53.9	53.9
P2	51	Female	Smoker	Cell large carcinoma	IVB	60	Pembrolizumab	Progressive Disease	Non-DCB	3.9	41.87
P3	76	Female	Smoker	Adenocarcinoma	IVB	60	Pembrolizumab	Progressive Disease	Non-DCB	2.03	29.7
P4	57	Female	Smoker	Squamous Cell Carcinoma	IVA	80	Pembrolizumab	Progressive Disease	Non-DCB	2.1	9.7
P5	55	Male	Smoker	Adenocarcinoma	IVA	60	Pembrolizumab	Stable Disease	DCB	6.07	20.43
P6	58	Female	Smoker	Squamous Cell Carcinoma	IVB	NA	Pembrolizumab	Progressive Disease	Non-DCB	2.77	6.83
P7	80	Female	Never Smoker	Adenocarcinoma	IVA	90	Pembrolizumab	Progressive Disease	Non-DCB	1.47	2.17
P8	68	Male	Smoker	Adenocarcinoma	IVB	95	Pembrolizumab	Partial Response	DCB	29.73	29.8
P9	74	Male	Former Smoker	Squamous Cell Carcinoma	IVB	90	Pembrolizumab	Partial Response	DCB	48.67	48.67
P10	59	Male	Smoker	Squamous Cell Carcinoma	IVB	80	Pembrolizumab	Partial Response	DCB	10.53	31.27
P11	58	Female	Smoker	Adenocarcinoma	IVB	60	Pembrolizumab	Progressive Disease	Non-DCB	2.57	2.73
P12	62	Male	Smoker	Adenocarcinoma	IVA	60	Pembrolizumab	Progressive Disease	Non-DCB	5.33	19.6
P13	69	Male	Smoker	Squamous Cell Carcinoma	IVB	90	Pembrolizumab	Stable Disease	DCB	8.87	15.6
P14	72	Female	Never Smoker	Squamous Cell Carcinoma	IVB	60	Pembrolizumab	Partial Response	DCB	11.37	13.4
P15	84	Male	Former Smoker	Squamous Cell Carcinoma	IIIB	70	Pembrolizumab	Partial Response	DCB	6.8	20.8
P16	57	Male	Smoker	Adenocarcinoma	IVB	70	Pembrolizumab	Complete Response	DCB	35.6	35.6
P17	87	Male	Former Smoker	Adenocarcinoma	IVA	80	Pembrolizumab	Partial Response	DCB	13.17	15.87
P18	67	Male	Smoker	Squamous Cell Carcinoma	IIIA	90	Pembrolizumab	Stable Disease	DCB	8.03	9.07
P19	60	Male	Smoker	Adenocarcinoma	IVA	90	Pembrolizumab	Progressive Disease	Non-DCB	0.7	11.03
P20	85	Male	Former Smoker	Adenocarcinoma	IIIB	90	Pembrolizumab	Progressive Disease	Non-DCB	4.4	9.2
P21	63	Female	Never Smoker	Adenocarcinoma	IVB	80	Pembrolizumab	Progressive Disease	Non-DCB	0.6	15.8
P22	62	Male	Smoker	Adenocarcinoma	IVB	70	Pembrolizumab	Progressive Disease	Non-DCB	1.33	1.37
P23	59	Male	Smoker	Adenocarcinoma	IIIA	90	Pembrolizumab	Progressive Disease	Non-DCB	1.57	44.27
P24	68	Male	Smoker	Adenocarcinoma	IVA	70	Pembrolizumab	Stable Disease	DCB	7.3	11.53
P25	52	Male	Smoker	Adenocarcinoma	IVB	90	Pembrolizumab	Partial Response	DCB	40.4	40.4
P26	67	Female	Smoker	Adenocarcinoma	IVB	60	Pembrolizumab	Complete Response	DCB	13.53	43.2
P27	69	Male	Smoker	Poorly differenciate	IVB	90	Pembrolizumab	Progressive Disease	Non-DCB	4.77	4.9
P28	73	Male	Smoker	Adenocarcinoma	IVB	100	Pembrolizumab	Stable Disease	DCB	6.53	12.5
P29	65	Female	Smoker	Adenocarcinoma	IVB	70	Pembrolizumab	Partial Response	DCB	18.6	28
P30	75	Male	Smoker	Squamous Cell Carcinoma	IIIB	60	Pembrolizumab	Stable Disease	DCB	11.4	36.77
P31	61	Male	Smoker	Adenocarcinoma	IVA	70	Pembrolizumab	Stable Disease	DCB	21.3	21.3
P32	63	Male	Smoker	Adenocarcinoma	IVA	60	Pembrolizumab	Complete Response	DCB	31.93	31.93
P33	69	Male	Smoker	Adenocarcinoma	IVB	90	Pembrolizumab	Progressive Disease	Non-DCB	2.6	40.23
P34	67	Male	Smoker	Adenocarcinoma	IIIB	95	Pembrolizumab	Stable Disease	DCB	12.53	35.1
P35	75	Male	Smoker	Adenocarcinoma	IIIA	100	Pembrolizumab	Stable Disease	DCB	15.03	25.5
P36	71	Male	Smoker	Squamous Cell Carcinoma	IIIA	90	Pembrolizumab	Progressive Disease	Non-DCB	1.4	3.9
P37	64	Male	Smoker	Adenocarcinoma	IVA	80	Pembrolizumab	Partial Response	DCB	42.17	42.17
P38	89	Male	Former Smoker	Adenocarcinoma	IIIA	80	Pembrolizumab	Progressive Disease	Non-DCB	2.43	2.43
P39	84	Female	Never Smoker	Poorly differenciate	IVB	80	Pembrolizumab	Stable Disease	DCB	42.97	42.97
P40	63	Male	Smoker	Adenocarcinoma	IVB	70	Pembrolizumab	Progressive Disease	Non-DCB	2.73	5.73
P41	55	Male	Smoker	5	IVB	100	Pembrolizumab	Complete Response	DCB	36.9	36.9
P42	82	Male	Former Smoker	Adenocarcinoma	IIIB	95	Pembrolizumab	Partial Response	DCB	16.53	16.53
P43	68	Male	Former Smoker	Adenocarcinoma	IVB	90	Pembrolizumab	Progressive Disease	Non-DCB	3.2	5.57
P44	59	Female	Smoker	Adenocarcinoma	IVB	90	Pembrolizumab	Partial Response	DCB	18.6	34.5
P45	74	Male	Former Smoker	Adenocarcinoma	IVA	70	Pembrolizumab	Progressive Disease	Non-DCB	3.17	6.3
P46	73	Male	Former Smoker	Squamous Cell Carcinoma	IIIB	60	Pembrolizumab	Progressive Disease	Non-DCB	1.37	3.03
P47	79	Male	Former Smoker	Adenocarcinoma	IVB	70	Pembrolizumab	Partial Response	DCB	18.9	22.6
P48	55	Male	Smoker	Adenocarcinoma	IVB	60	Pembrolizumab	Partial Response	DCB	31.8	31.8
P49	57	Male	Smoker	Squamous Cell Carcinoma	IIIB	60	Pembrolizumab	Progressive Disease	Non-DCB	1.6	3.5
P50	85	Male	Smoker	Adenocarcinoma	IVB	60	Pembrolizumab	Progressive Disease	Non-DCB	3	3.27
P51	74	Male	Former Smoker	Squamous Cell Carcinoma	IVA	80	Pembrolizumab	Progressive Disease	Non-DCB	3.47	3.47
P52	81	Male	Smoker	Adenocarcinoma	IVA	80	Pembrolizumab	Partial Response	DCB	17.23	17.23
a.TPS: Tumor Proportion Score.
ᶧ Progression or death during follow-up.
NA: Non Available
